# Supplementary material for: Nanoparticle-Based Tough Polymers with Crack-Propagation Resistance
Source: PubMed Central journal article supplement — Langmuir. 2023 Jun 16;39(26):9262–72. doi: 10.1021/acs.langmuir.3c01226 (PMC10337026; doi:10.1021/acs.langmuir.3c01226), 2023-06-16
Supplement: la3c01226_si_002.pdf [file la3c01226_si_002.pdf]

## Supporting information

### Nanoparticle-based Tough Polymers with Crack-propagation Resistance

Yuma Sasaki,<sup>1</sup> Yuichiro Nishizawa,<sup>1</sup> Takumi Watanabe,<sup>1</sup> Takuma Kureha,<sup>3</sup> Kazuya Uenishi,<sup>4</sup> Kazuko Nakazono,<sup>5</sup> Toshikazu Takata,<sup>\*5,6</sup> and Daisuke Suzuki<sup>\*1,2</sup>

<sup>1</sup>Graduate School of Textile Science & Technology, Shinshu University, 3-15-1 Tokida, Ueda, Nagano 386-8567, Japan

<sup>2</sup>Research Initiative for Supra-Materials, Interdisciplinary Cluster for Cutting Edge Research, Shinshu University, 3-15-1 Tokida, Ueda, Nagano 386-8567, Japan

<sup>3</sup>Department of Frontier Materials Chemistry, Graduate School of Science and Technology, Hirosaki University, 3 Bunkyo-cho, Hirosaki 036-8561, Japan

<sup>4</sup>Yokohama Rubber Co., Ltd., 2-1 Oiwake, Hiratsuka, Kanagawa 254-8601, Japan.

<sup>5</sup>Department of Chemical Science and Engineering, Tokyo Institute of Technology, 4259 Nagatsuta-cho, Midori-ku, Yokohama, Kanagawa 226-8503, Japan

<sup>6</sup>Graduate School of Advanced Science and Engineering, Hiroshima University, 1-4-1 Kagamiyama, Higashi-Hiroshima, Hiroshima 739-8527, Japan

## Experimental Details

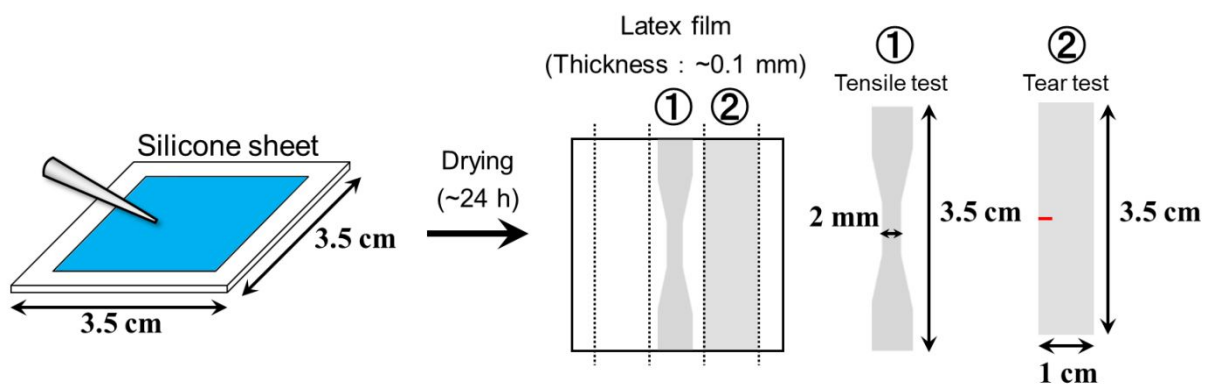

**Figure S1.** Schematic illustration of the preparation of the tear test specimens.

## Results and Discussion

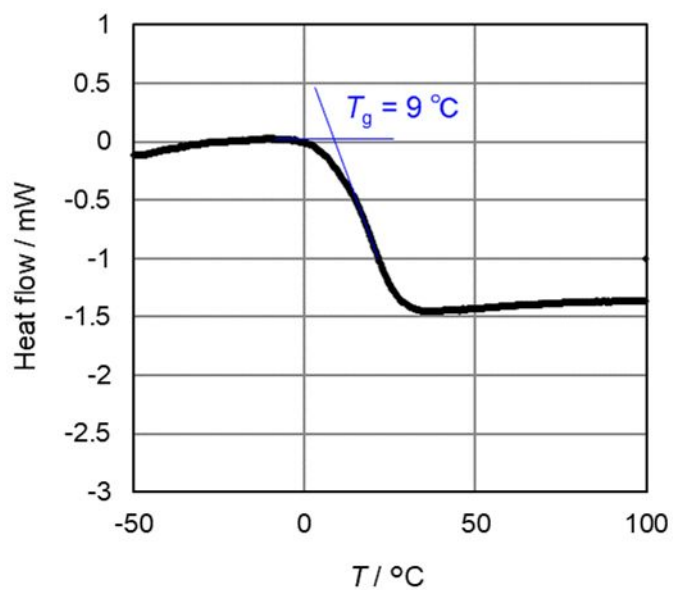

**Figure S2.** Representative DSC curve (second heating) for an EM microparticle at a heating rate of 10 °C/min.  $T_g$  was calculated from the cross-point of tangents to the baseline and inflection point.

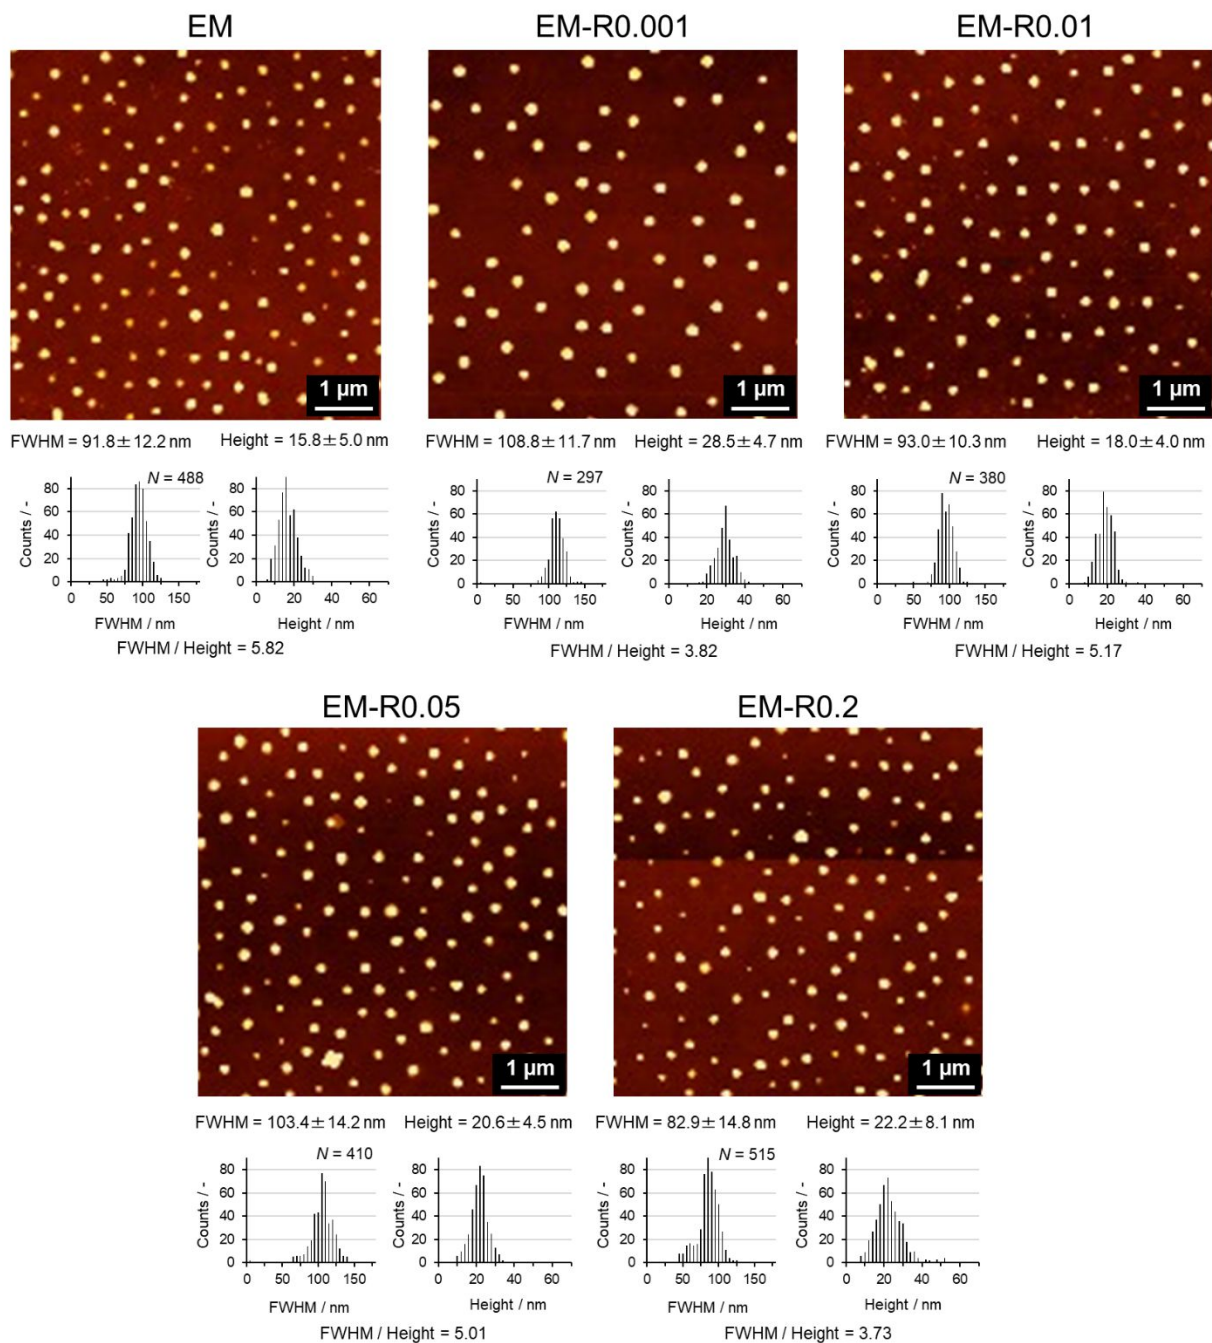

**Figure S3.** AFM height images of the EM and EM-RX ( $X = 0.001, 0.01, 0.05, 0.2$ ) microparticles dried on a glass substrate and their determined sizes (FWHM and the maximum height).

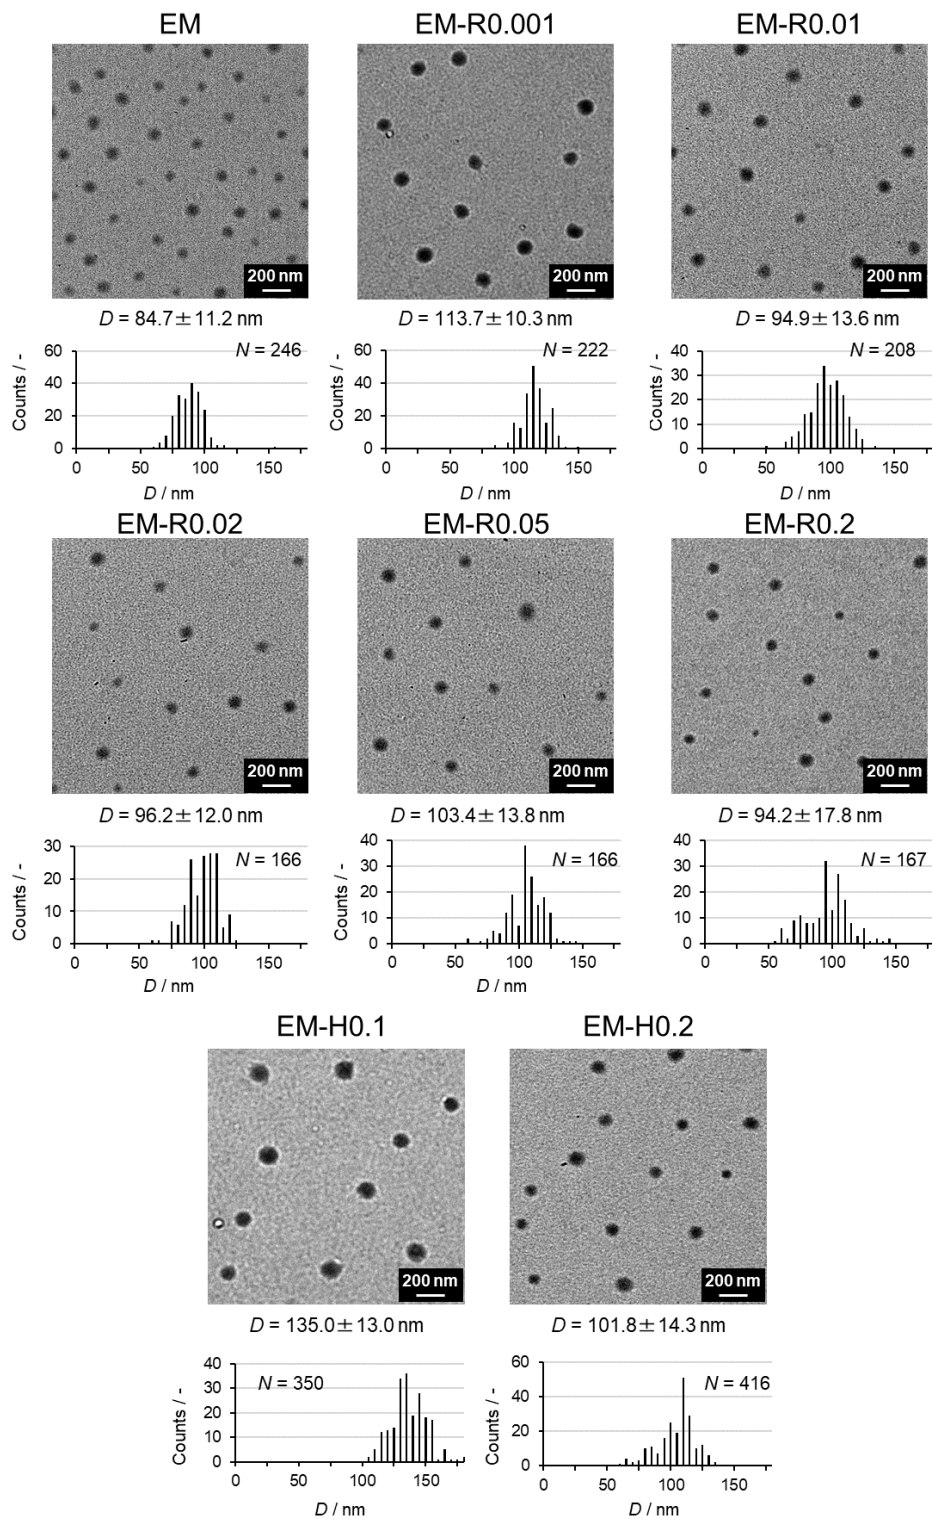

**Figure S4.** TEM images of EM and EM-RX ( $X = 0.001, 0.01, 0.02, 0.05, 0.2$ ) as well as EM-HY ( $Y = 0.1, 0.2$ ) microparticles dried on the copper grid.

(a)

|           | Mass of soluble fraction<br>$w_1$ / mg | Original mass<br>$w_2$ / mg | GC%<br>$= (w_2 - w_1) / w_2 \times 100$ |
|-----------|----------------------------------------|-----------------------------|-----------------------------------------|
| EM        | 614.9                                  | 619.6                       | <1                                      |
| EM-R0.001 | 598.0                                  | 602.8                       | <1                                      |
| EM-R0.01  | 601.8                                  | 620.8                       | 3                                       |
| EM-R0.02  | 270.7                                  | 285.0                       | 5                                       |
| EM-R0.05  | 473.4                                  | 592.3                       | 20                                      |
| EM-R0.2   | 476.9                                  | 768.3                       | 38                                      |

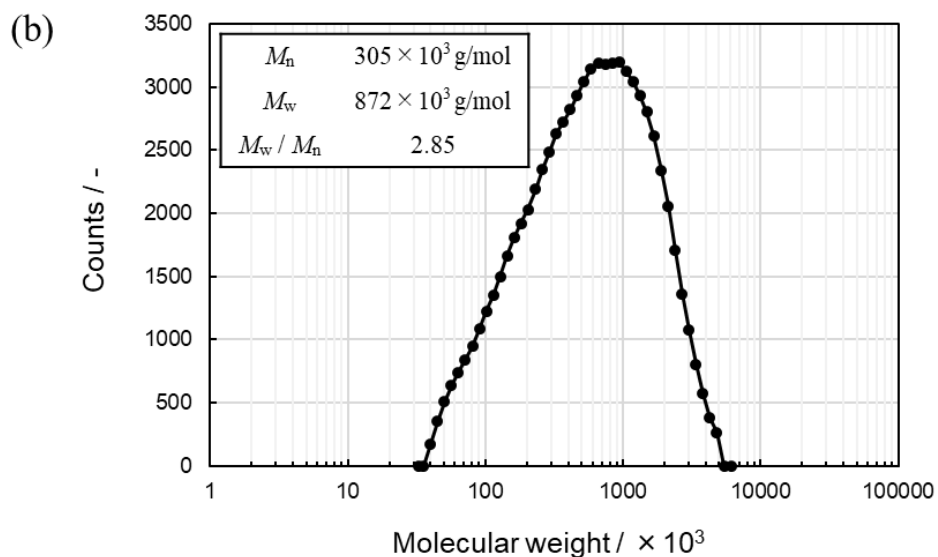

**Figure S5** (a) Weight of the soluble mass ( $w_1$ ) and original mass ( $w_2$ ) obtained from the Soxhlet extraction of EM and EM-RX ( $X = 0.001, 0.01, 0.02, 0.05, 0.2$ ) microparticles. (b) Molecular-weight distribution of the soluble fraction of EM microparticles acquired from GPC measurements.

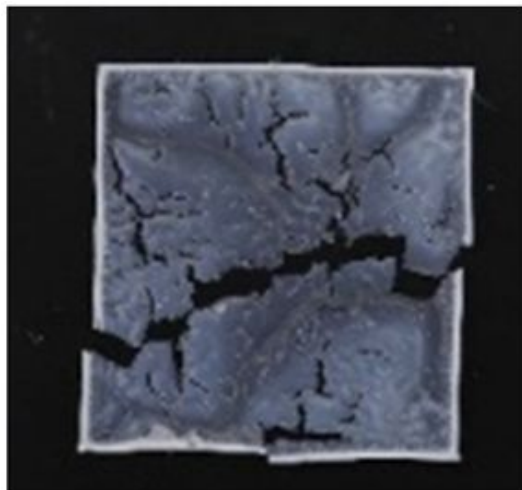

1 cm

**Figure S6.** Photograph of a EM-R0.4 film. The EM-R0.4 microparticles formed a brittle film.

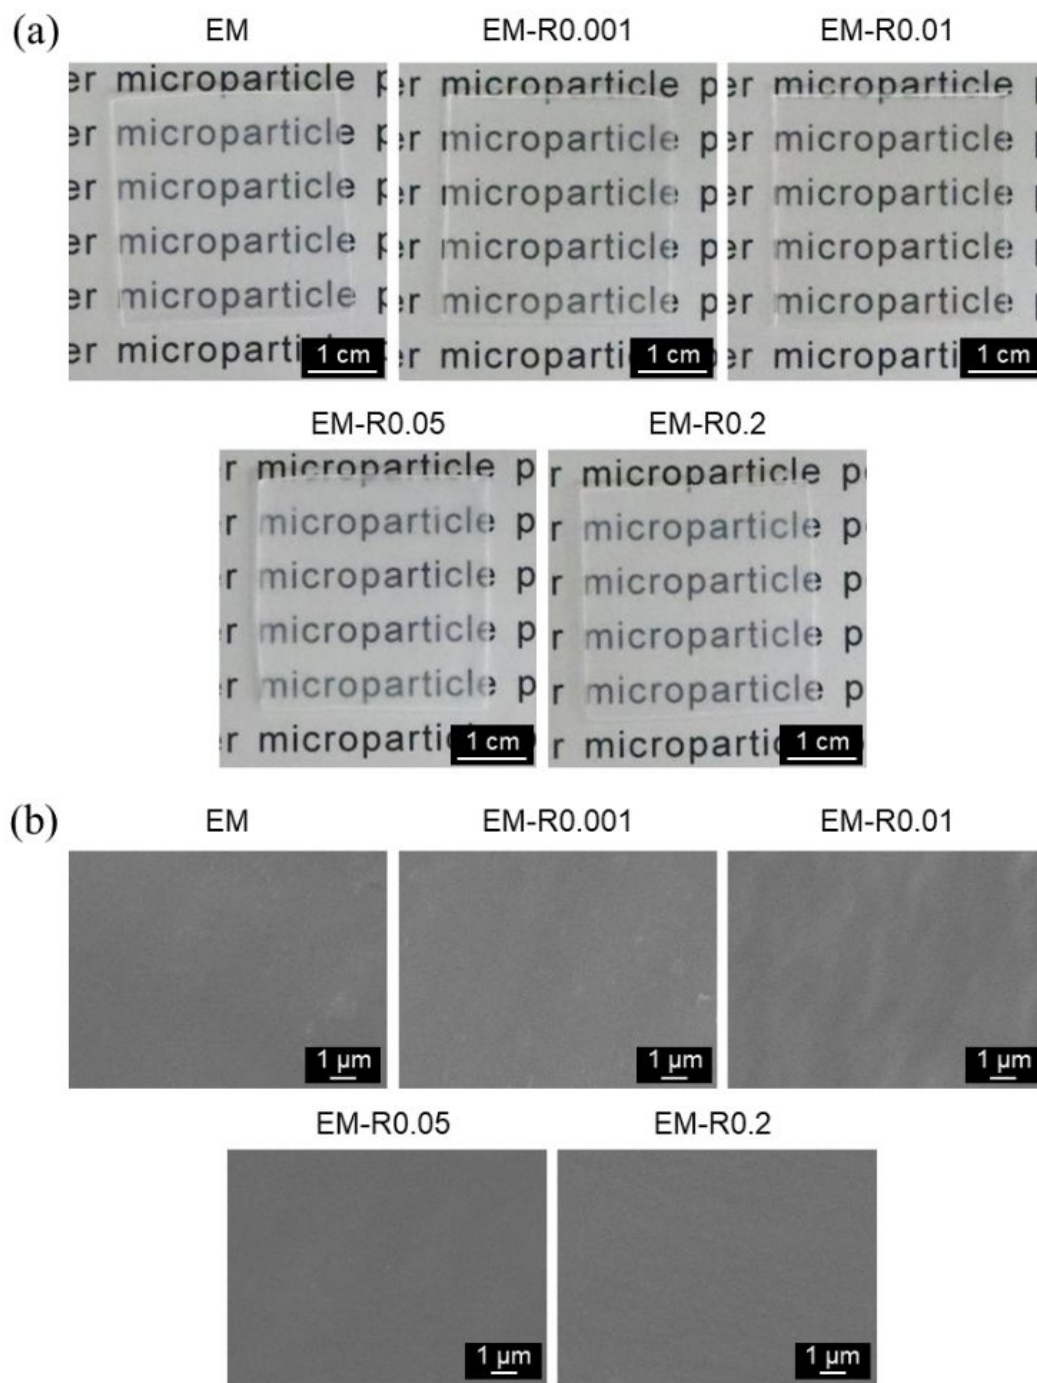

**Figure S7.** (a) Photographs and (b) SEM images (surface) of the EM and EM-RX ( $X = 0.001, 0.01, 0.05, 0.2$ ) films.



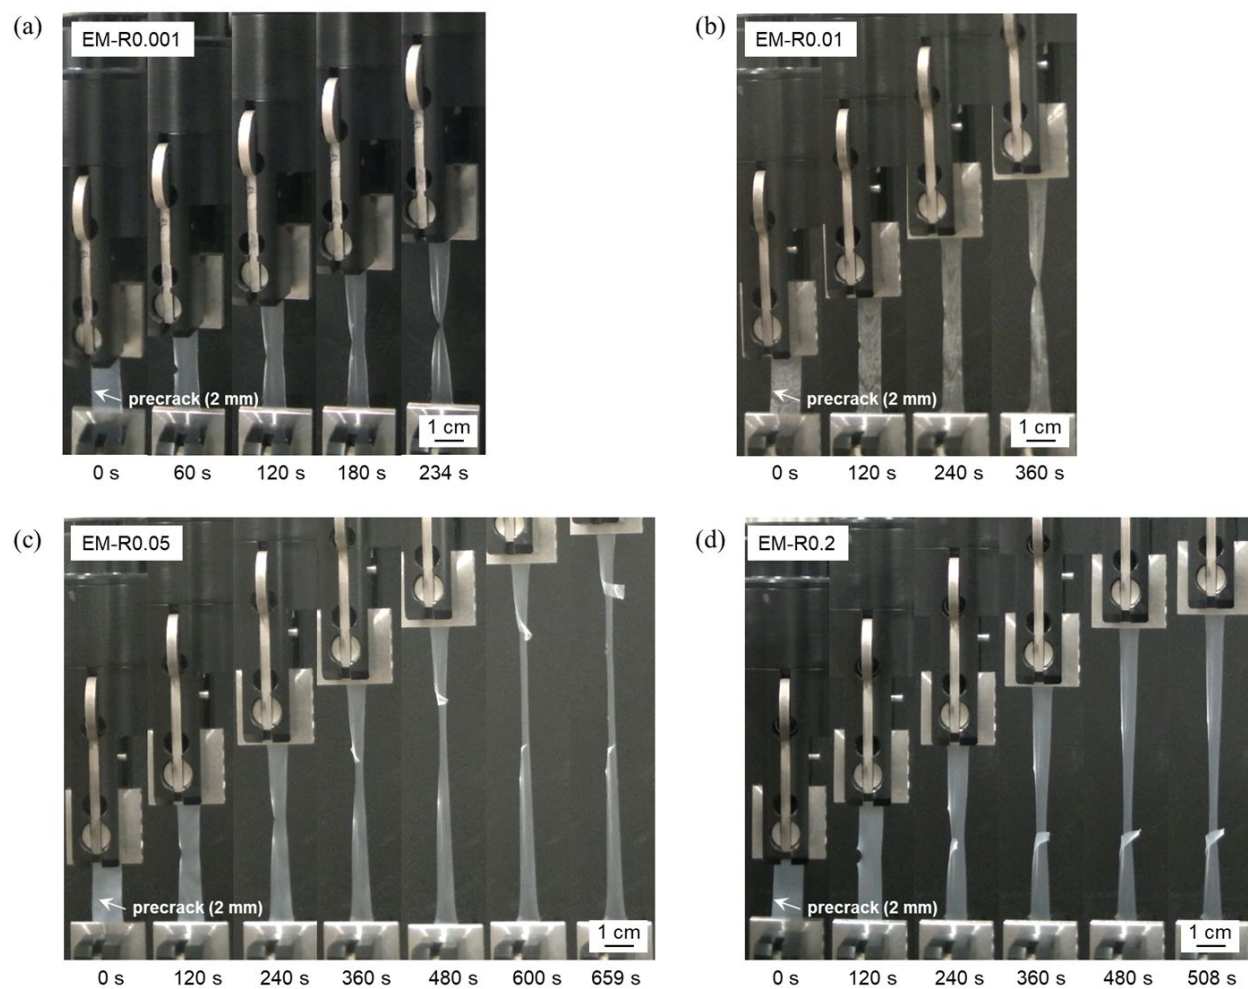

**Figure S8.** Time-lapse photographs the tear tests of the (a) EM-R0.001, (b) EM-R0.01, (c) EM-R0.05, and (d) EM-R0.2 films. The initial crack length  $c$  and elongation rate were fixed at 2 mm and 10 mm/min, respectively.

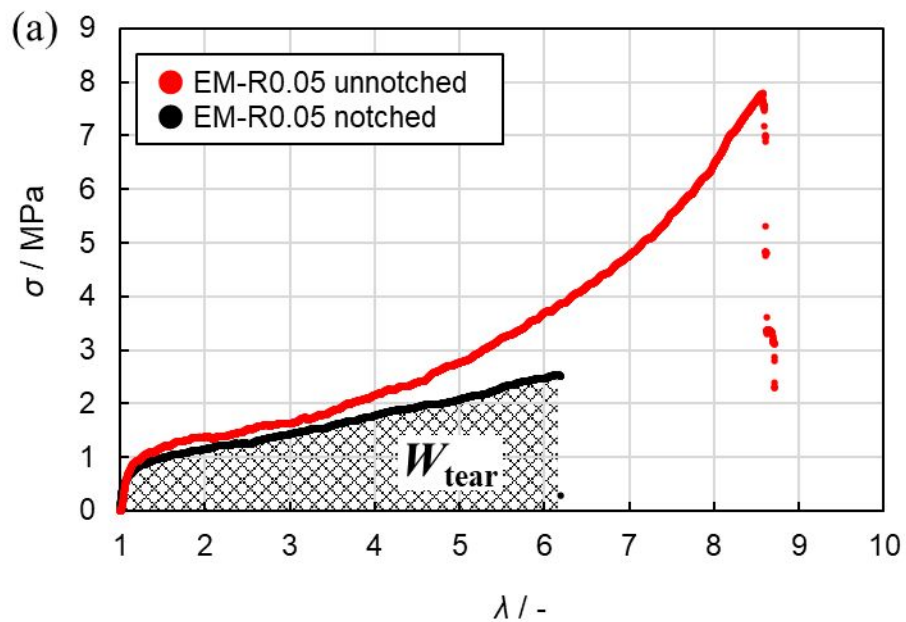

(b)

|           | Young's Modulus $E$ / MPa | Maximum extension ratio $\lambda_{\text{max}}$ / - | Maximum stress $\sigma_{\text{max}}$ / - |
|-----------|---------------------------|----------------------------------------------------|------------------------------------------|
| notched   | $8.1 \pm 1.4$             | $5.8 \pm 0.7$                                      | $2.1 \pm 0.4$                            |
| unnotched | $4.1 \pm 2.7$             | $8.5 \pm 1.3$                                      | $5.9 \pm 2.1$                            |

**Figure S9.** (a)  $\sigma$ - $\lambda$  curves for the notched and unnotched EM-R0.05 latex films. (b) The Young's modulus  $E$ , maximum extension ratio  $\lambda_{\text{max}}$ , and maximum stress  $\sigma_{\text{max}}$  values obtained from the  $\sigma$ - $\lambda$  curves.

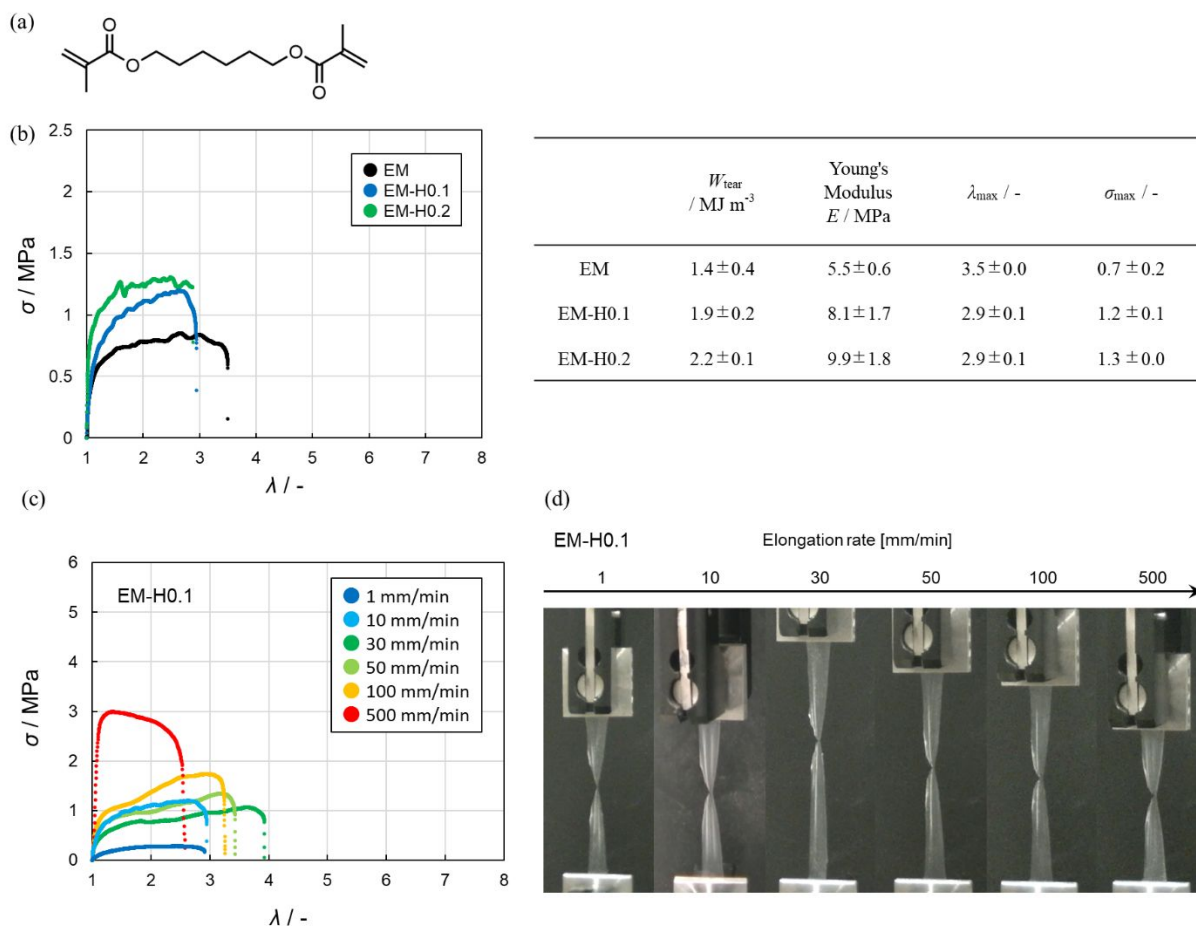

**Figure S10.** (a) Chemical structure of 1,6-hexanediol dimethacrylate (HDD), which was selected as a conventional chemical crosslinker. (b) Stress-extension ratio curves of tear tests for HDD-crosslinked EM-H films. Elongation rate was fixed at 10 mm/min. Elongation-rate dependence of (c) stress-extension ratio curves and (d) photographs of latex films just before fracture at various rates.

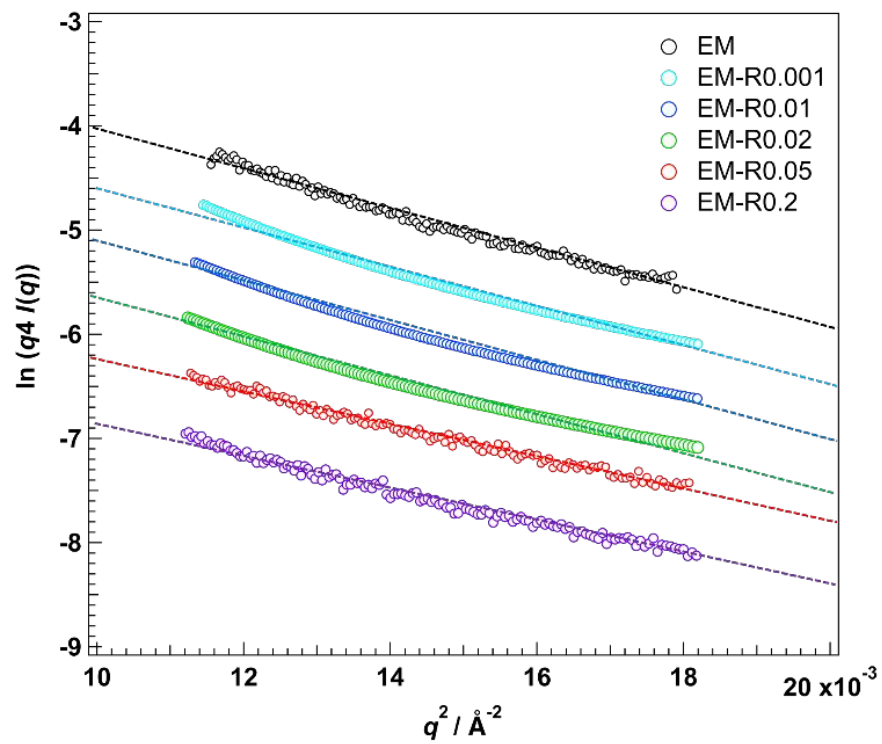

**Figure S11.** SAXS scattering intensity in the high- $q$  range for EM and EM-R films.

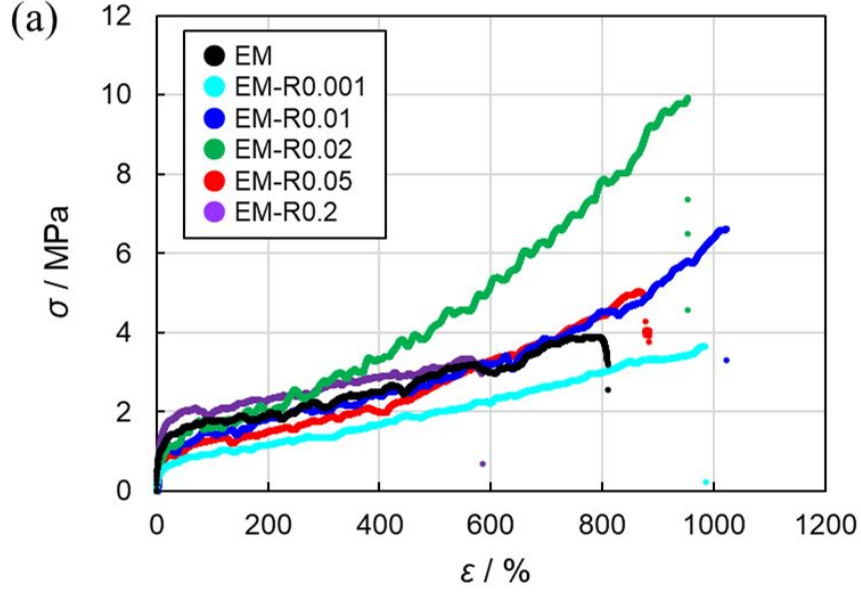

(b)

|           | Energy density function<br>$U / \text{MJ m}^{-3}$ | Young's modulus<br>$E / \text{MPa}$ | Maximum strain<br>$\varepsilon_{\text{max}} / \%$ | Maximum stress<br>$\sigma_{\text{max}} / \text{MPa}$ |
|-----------|---------------------------------------------------|-------------------------------------|---------------------------------------------------|------------------------------------------------------|
| EM        | $16.9 \pm 3.9$                                    | $8.9 \pm 6.6$                       | $789.3 \pm 108.7$                                 | $3.5 \pm 0.6$                                        |
| EM-R0.001 | $19.4 \pm 2.0$                                    | $4.1 \pm 2.3$                       | $959.2 \pm 44.8$                                  | $3.7 \pm 0.2$                                        |
| EM-R0.01  | $34.4 \pm 5.1$                                    | $8.2 \pm 2.4$                       | $932.3 \pm 99.8$                                  | $7.8 \pm 1.5$                                        |
| EM-R0.02  | $43.3 \pm 4.3$                                    | $12.2 \pm 1.2$                      | $954.3 \pm 22.5$                                  | $10.0 \pm 1.3$                                       |
| EM-R0.05  | $23.3 \pm 4.9$                                    | $8.1 \pm 3.1$                       | $925.6 \pm 78.3$                                  | $5.2 \pm 0.6$                                        |
| EM-R0.2   | $14.9 \pm 1.8$                                    | $9.4 \pm 14.7$                      | $592.2 \pm 29.7$                                  | $3.4 \pm 0.5$                                        |

**Figure S12.** (a) Stress-strain curves for the EM and EM-RX ( $X=0.001, 0.01, 0.02, 0.05, 0.2$ ) films obtained from tensile test measurements. (b) The Energy density function  $U$ , Young's modulus  $E$ , maximum strain  $\varepsilon_{\text{max}}$ , and maximum stress  $\sigma_{\text{max}}$  values obtained from the stress-strain curves. The tensile speed was fixed at 10 mm/min. Each curve was extracted from those close to its mean ( $N = 3$ ).

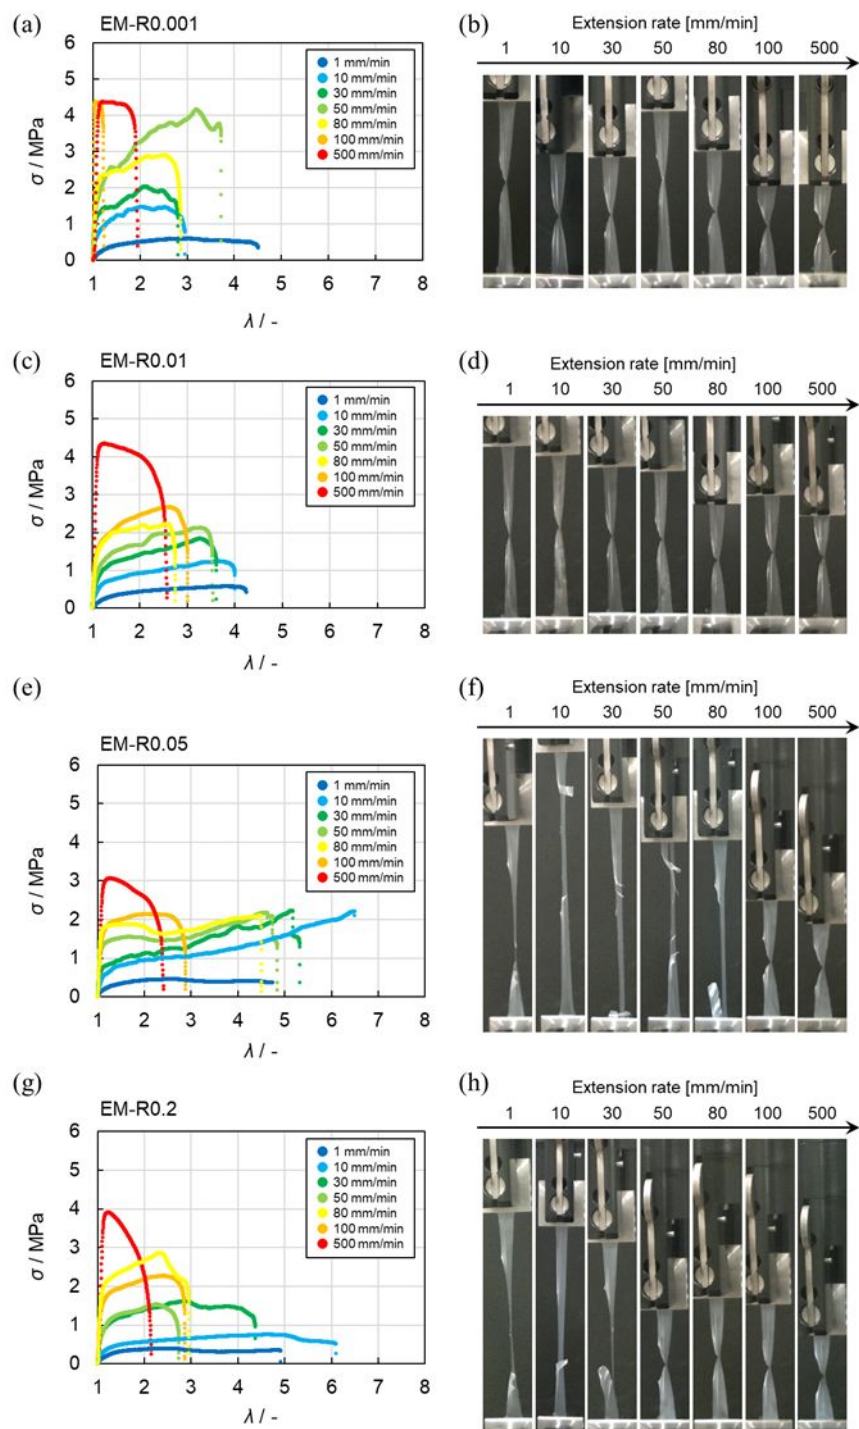

**Figure S13.** (a,c,e,g) Stress-extension ratio curves for the EM-RX latex films obtained from tear tests conducted at various elongation rates. (b,d,f,h) Photographs of the EM-RX latex films just before fracture at various elongation rates.

**Movie S1.** The fracture behavior of an EM film during a tear test at an elongation rate of 10 mm/min. Note that this video has been modified to 50x speed.

**Movie S2.** The fracture behavior of an EM-R0.02 film during a tear test at an elongation rate of 10 mm/min. Note that this video has been modified to 50x speed.
